# Supplementary material for: Treatment Approach and Sequence Effects in Cognitive Behavioral Therapy Targeting Emotion Regulation Among Adolescents with Externalizing Problems and Intellectual Disabilities
Source: Springer Nature journal article supplement (doi:10.1007/s10608-021-10261-1), 2021-08-22
Supplement: MOESM1 [file 19589584]

Supplementary Table A

*Pearson Correlations between Study Variables*

|                                    | 1.    | 2.    | 3.    | 4.    | 5.    | 6.    | 7.    | 8.    | 9.    | 10.  |
|------------------------------------|-------|-------|-------|-------|-------|-------|-------|-------|-------|------|
| 1. Baseline weekly ER              |       |       |       |       |       |       |       |       |       |      |
| 2. Baseline weekly Aggression      | .48** |       |       |       |       |       |       |       |       |      |
| 3. T1 ER difficulties              | .59** | .17   |       |       |       |       |       |       |       |      |
| 4. T1 EXT self-reported            | .63** | .49** | .67** |       |       |       |       |       |       |      |
| 5. T1 EXT clinical-staff reported  | -.14  | -.08  | .12   | .01   |       |       |       |       |       |      |
| 6. T2 ER difficulties              | .68** | .59** | .68** | .74** | .12   |       |       |       |       |      |
| 7. T2 EXT self-reported            | .54** | .32   | .58** | .80** | -.08  | .80** |       |       |       |      |
| 8. T2 EXT clinical-staff reported  | .02   | .04   | .02   | .09   | .65** | .13** | .17   |       |       |      |
| 9. T3 ER difficulties              | .54** | .39*  | .67** | .66*  | -.14  | .72** | .61** | .16   |       |      |
| 10. T3 EXT self-reported           | .49** | .28   | .59** | .77** | -.09  | .68** | .73** | .19   | .61** | -.09 |
| 11. T3 EXT clinical-staff reported | .05   | -.10  | .09   | .13   | .49** | .24   | .27   | .77** | .43*  | .42* |

*Note.* ER = Emotion Regulation, EXT = Externalizing problems

\*  $p < .05$ . \*\*  $p < .01$

Supplementary Table B

*Available Data, Means and Standard Deviations of the Weekly Measure*

| Week number | Percentage data available | Emotion regulation difficulties |           | Aggressive behavior |           |
|-------------|---------------------------|---------------------------------|-----------|---------------------|-----------|
|             |                           | <i>M</i>                        | <i>SD</i> | <i>M</i>            | <i>SD</i> |
| 1           | 67%                       | 1.92                            | 0.72      | 1.76                | 0.72      |
| 2           | 98%                       | 1.68                            | 0.67      | 1.75                | 0.60      |
| 3           | 74%                       | 1.83                            | 0.81      | 1.61                | 0.65      |
| 4           | 76%                       | 1.83                            | 0.66      | 1.52                | 0.57      |
| 5           | 71%                       | 2.11                            | 0.95      | 1.88                | 0.72      |
| 6           | 60%                       | 1.49                            | 0.48      | 1.57                | 0.83      |
| 7           | 45%                       | 1.51                            | 0.39      | 1.61                | 0.51      |
| 8           | 45%                       | 1.54                            | 0.39      | 1.35                | 0.36      |
| 9           | 55%                       | 1.46                            | 0.45      | 1.59                | 0.70      |
| 10          | 40%                       | 1.59                            | 0.46      | 1.82                | 0.88      |
| 11          | 40%                       | 1.59                            | 0.58      | 1.41                | 0.45      |
| 12          | 50%                       | 1.49                            | 0.49      | 1.52                | 0.70      |
| 13          | 48%                       | 1.82                            | 0.68      | 1.65                | 0.62      |
| 14          | 48%                       | 1.78                            | 0.66      | 1.67                | 0.72      |
| 15          | 36%                       | 1.71                            | 0.78      | 1.51                | 0.60      |
| 16          | 29%                       | 1.86                            | 0.81      | 1.44                | 0.50      |
| 17          | 26%                       | 1.55                            | 0.60      | 1.36                | 0.55      |
